# Supplementary material for: Concordance of B‐ and T‐cell responses to SARS‐CoV‐2 infection, irrespective of symptoms suggestive of COVID‐19
Source: PubMed Central journal article supplement (PMC9349709; doi:10.1002/jmv.28016), 2022-07-30
Supplement: JMV-94-5217-s001.pdf [file JMV-94-5217-s001.pdf]

## **Supplementary Methods**

### **Humoral assays**

Spike and nucleocapsid protein were expressed as previously described<sup>13</sup>. All sera were heat-inactivated at 56°C for 30 mins before use. High-binding ELISA plates (Corning, 3690) were coated with antigen (Spike or N) at 3 µg/mL (25 µL per well) in PBS, either overnight at 4°C or 2 hr at 37°C. Wells were washed with PBS-T (PBS with 0.05% Tween-20) and then blocked with 100 µL 5% milk in PBS-T for 1 hr at room temperature. Wells were emptied and sera (diluted at 1:50 in milk) added and incubated for 2 hr at room temperature. Control reagents included CR3009 (2 µg/mL), CR3022 (0.2 µg/mL), negative control plasma (1:25 dilution), positive control plasma (1:50) and blank wells. Wells were washed with PBS-T. Secondary antibody was added and incubated for 1 hr at room temperature. IgM was detected using Goat-anti-human-IgM-HRP (1:1,000) (Sigma: A6907) and IgG was detected using Goat-anti-human-Fc-AP (1:1,000) (Jackson: 109-055-098-JIR). Wells were washed with PBS-T and either AP substrate (Sigma) was added and read at 405 nm (AP) or 1-step TMB substrate (Thermo Scientific) was added and quenched with 0.5 M H<sub>2</sub>SO<sub>4</sub> before reading at 450 nm (HRP)

### **PBMC stimulation with SARS-CoV-2 overlapping peptide pools**

PBMC were stimulated with pools of overlapping peptides spanning the whole sequence of the SARS-CoV-2 Matrix (M) and Nucleocapsid (N) proteins (Peptivator peptide pools, Miltenyi) and two pools spanning the S1 and S2 domains of the SARS-CoV-2 spike protein (Peptivator\_Prot\_S1 Miltenyi and PepMix SARS-CoV-2 vial 2, JPT Peptide Technologies). These peptide pools can stimulate both MHC-I and MHC-II restricted T cells without HLA bias<sup>21</sup>. Response to the S1 protein subunit is most comparable with IgG-S antibody testing. All peptides were used at a final concentration of 0.33 ng/µl. Superantigen Enterotoxin B (SEB) at 100ng/mL (Sigma Aldrich) was used as a positive control; Infanrix, a hexa-vaccine (GlaxoSmithKline) and Influvac, an Influenza surface antigen vaccine (Abbott Biologicals) were combined (HA + INF) and used to examine anamnestic responses induced by

vaccination or infection. Peptide diluent (DMSO) was used as a negative control. PBMC ( $1-2 \times 10^6$  /stimuli) were incubated for 18h at 37°C in 48-well plates in X-Vivo media (Lonza) supplemented with 5% human AB serum (Sigma) and 0.4µg/mL anti-CD40 antibody (BioXcell).

### **Flow Cytometry**

Following incubation, PBMC were stained with a live/dead cell marker (LIVE/DEAD™ Fixable Near-IR Dead Cell Stain Kit - Invitrogen) and cell surface markers (Supplementary Table 1). Samples were acquired on a LSRFortessa Flow Analyser (BD Biosciences) and analysed using the software FlowJo (TreeStar Inc., version 10.7.2). As previously described, we defined activated conventional helper T cells based on the expression of CD69 and CD40L (CD154) and activated regulatory T cells based on upregulation of 4-1BB (CD137) and GARP in CD40L negative cells<sup>14-16</sup>. We also further defined T-Cell subsets based on chemokine receptor expression (CXCR3, CCR6, CCR4 CXCR6 and CXCR5), and on memory status (CD45RA, CCR7), for presentation in supplementary data (Supplementary Figure 2+3).

Antigen-specific T cell responses were described as the frequency of cells responding to each stimulus as a percentage of live total CD4<sup>+</sup> T cells following subtraction of unstimulated controls. Negative values were set to zero.

Stored PBMCs from anonymised healthy controls recruited pre-pandemic were used to define thresholds for T cell responses to SARS-CoV-2 peptides in ROC analysis. A threshold of 0.22% increase in frequency of live T cells responding to SARS-CoV-2 peptide pools was established as optimal (sensitivity 76.9%, specificity 80%) (Figure 1A).

**Supplementary Table S1:** Cell Surface markers used to identify T cell subsets

| Cell Surface Marker | Clone/Fluorochrome            | Manufacturer |
|---------------------|-------------------------------|--------------|
| <b>GARP</b>         | Clone 7B11- APC               | BioLegend    |
| <b>GARP</b>         | Clone G14D9-eFluor 660        | eBioscience  |
| <b>CD19</b>         | Clone HIB19 -APC/Cy7          | BioLegend    |
| <b>CD137</b>        | Clone 4B4-1 - BV421           | BioLegend    |
| <b>CD134/OX-40</b>  | Clone Ber-ACT35 – BV605       | BioLegend    |
| <b>CD154</b>        | Clone 24-31 - BV771           | BioLegend    |
| <b>CD69</b>         | Clone FN50 - FITC             | BioLegend    |
| <b>CD14</b>         | Clone HCD14 - APC/Cy7         | BioLegend    |
| <b>HLA-DR</b>       | Clone L243 - PE-Dazzle<br>594 | BioLegend    |
| <b>CD4</b>          | Clone RPA-T4 - BUV395         | BD           |
| <b>CD8</b>          | Clone SK1 - BUV737            | BD           |
| <b>CD45RA</b>       | Clone HI100 - BV785           | BioLegend    |
| <b>CCR7</b>         | Clone 3D12 - APC-R700         | BD           |
| <b>CCR6</b>         | Clone 11A9 - BV650            | BD           |
| <b>CXCR6</b>        | Clone K041E5 - PE             | BioLegend    |
| <b>CXCR3</b>        | Clone G025H7 - PE/Cy5         | BD           |
| <b>CXCR5</b>        | Clone J252D4 - PE/Cy7         | BioLegend    |

**Supplementary Fig 1: Flowchart of enrolment into cohort**

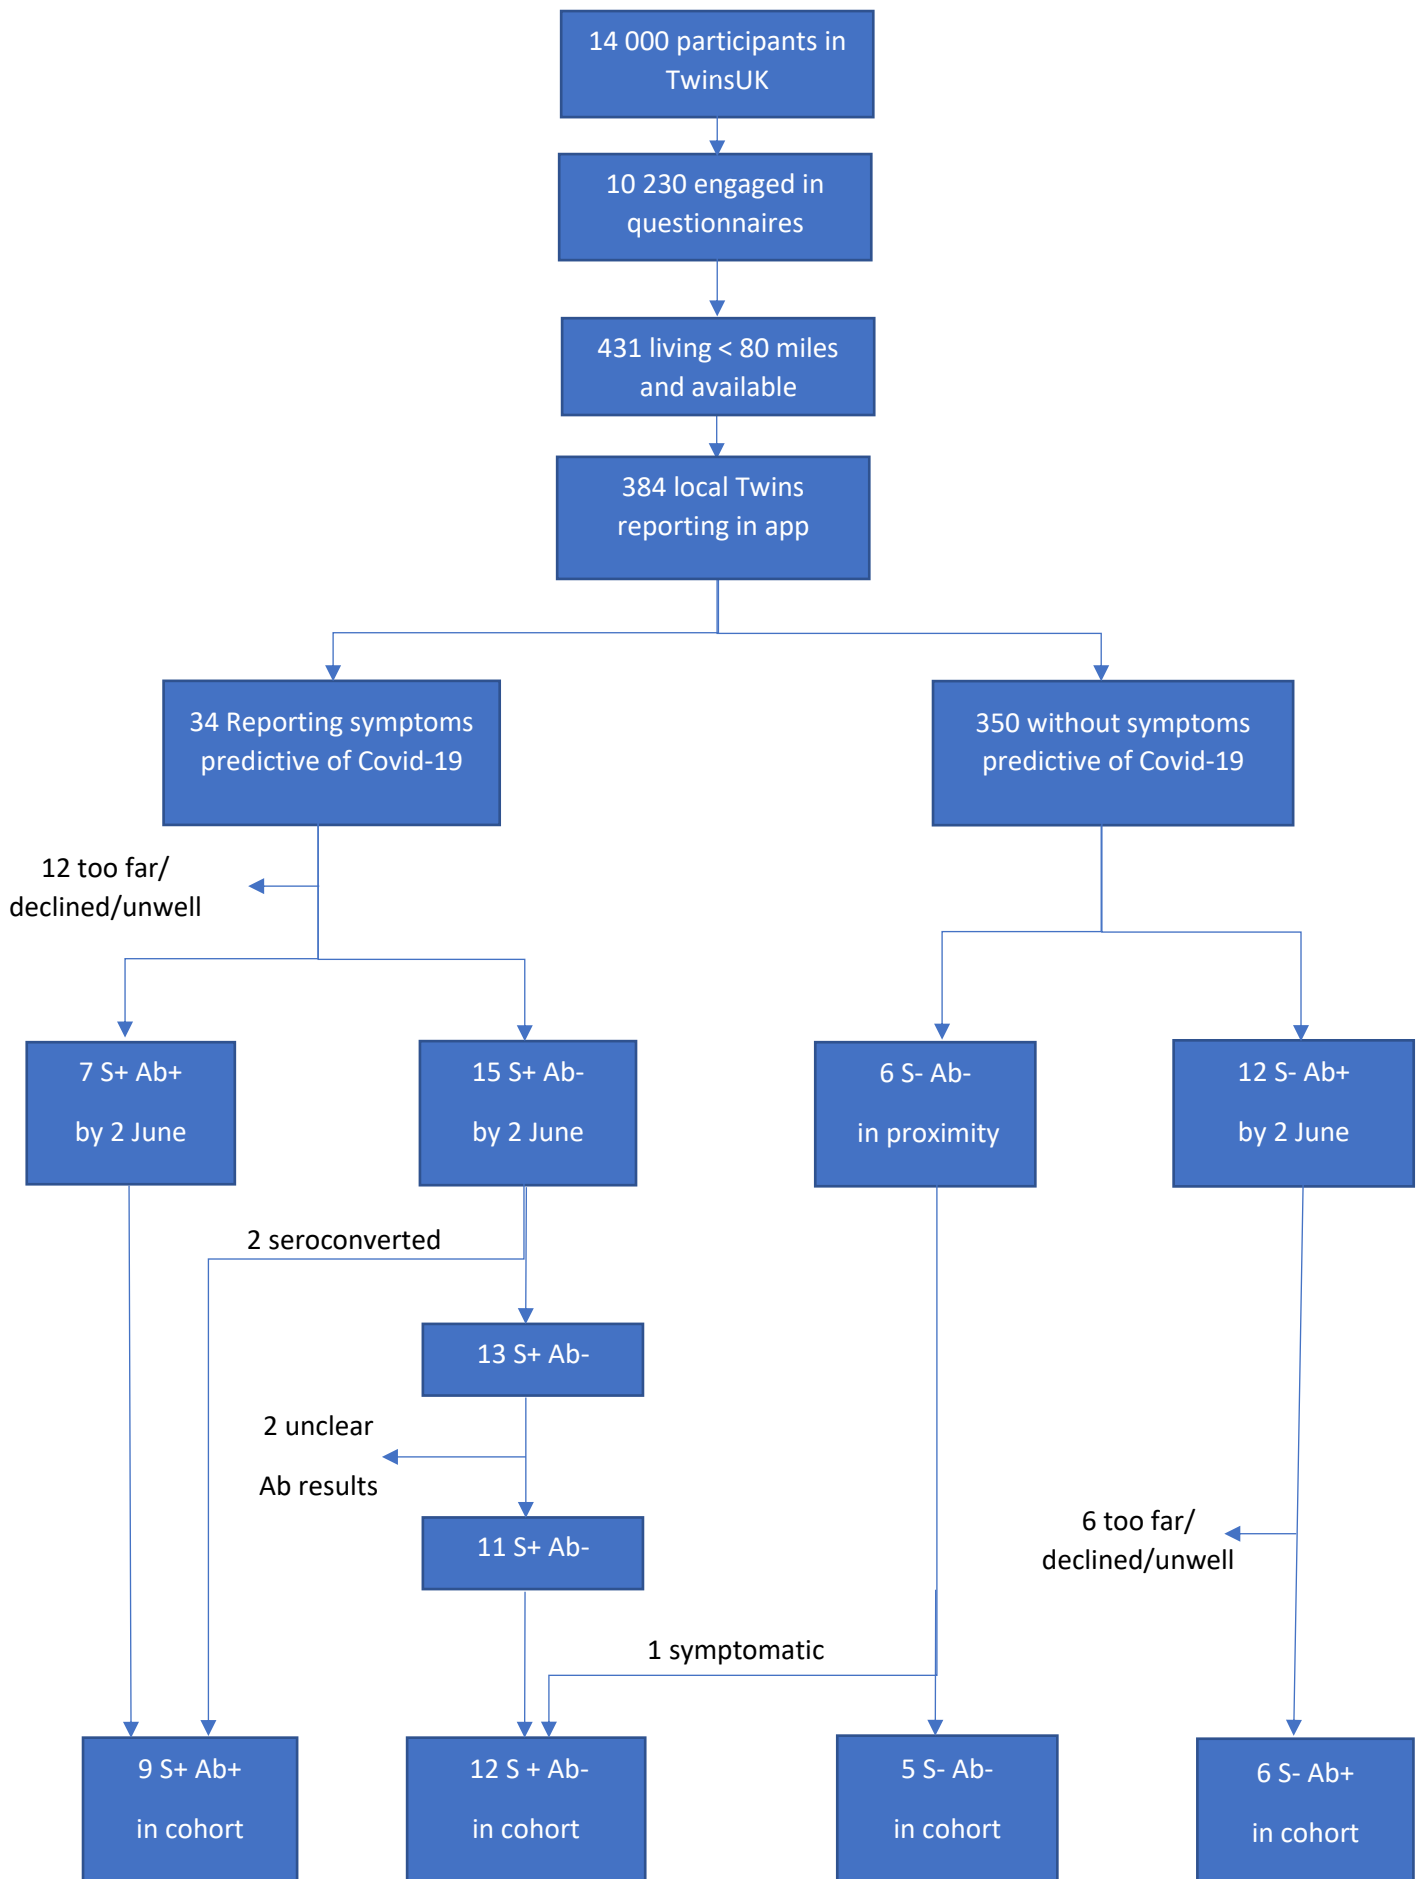

## Supplementary Figure 2

A.

### DMSO – T cell responses

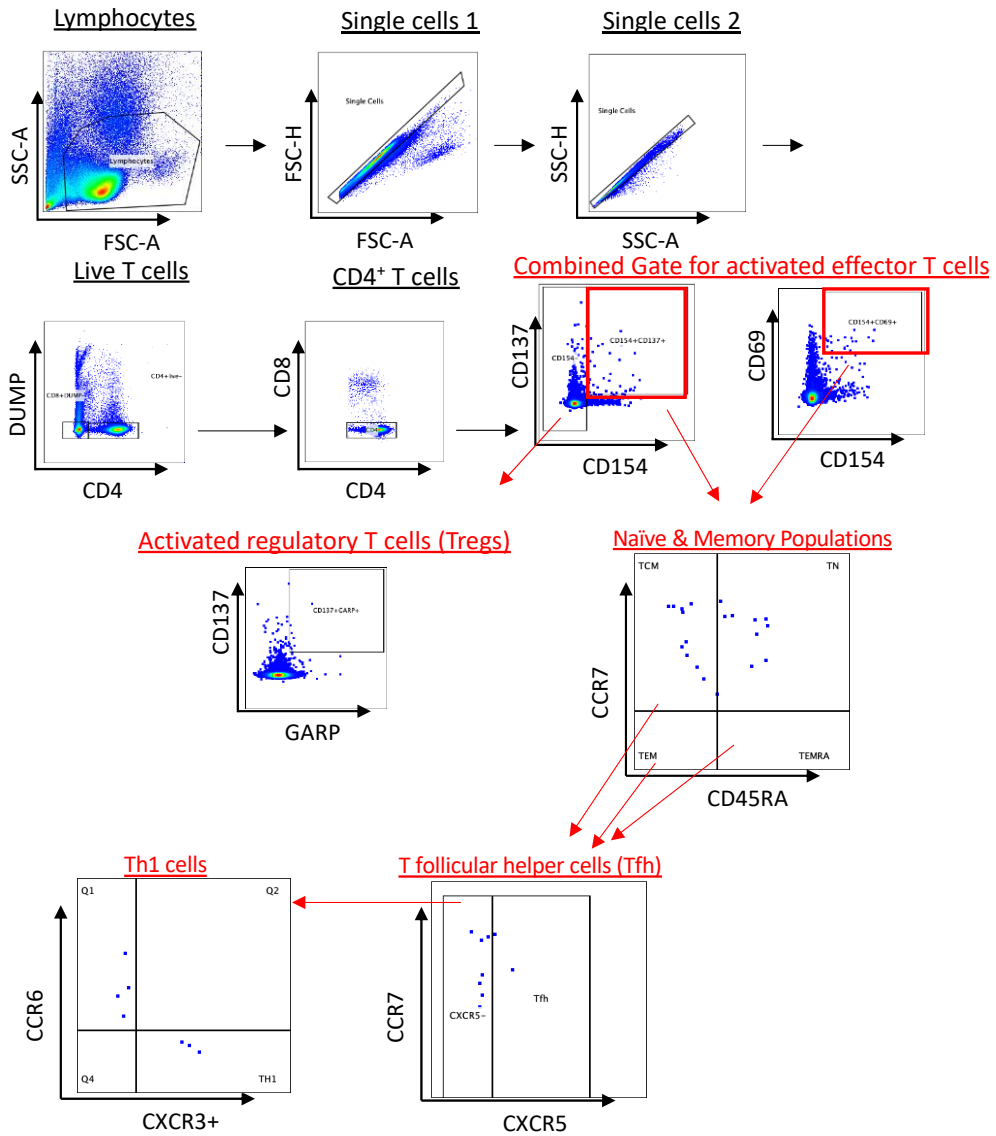

**B.**

**Spike Protein Domain 1 - T cell responses**

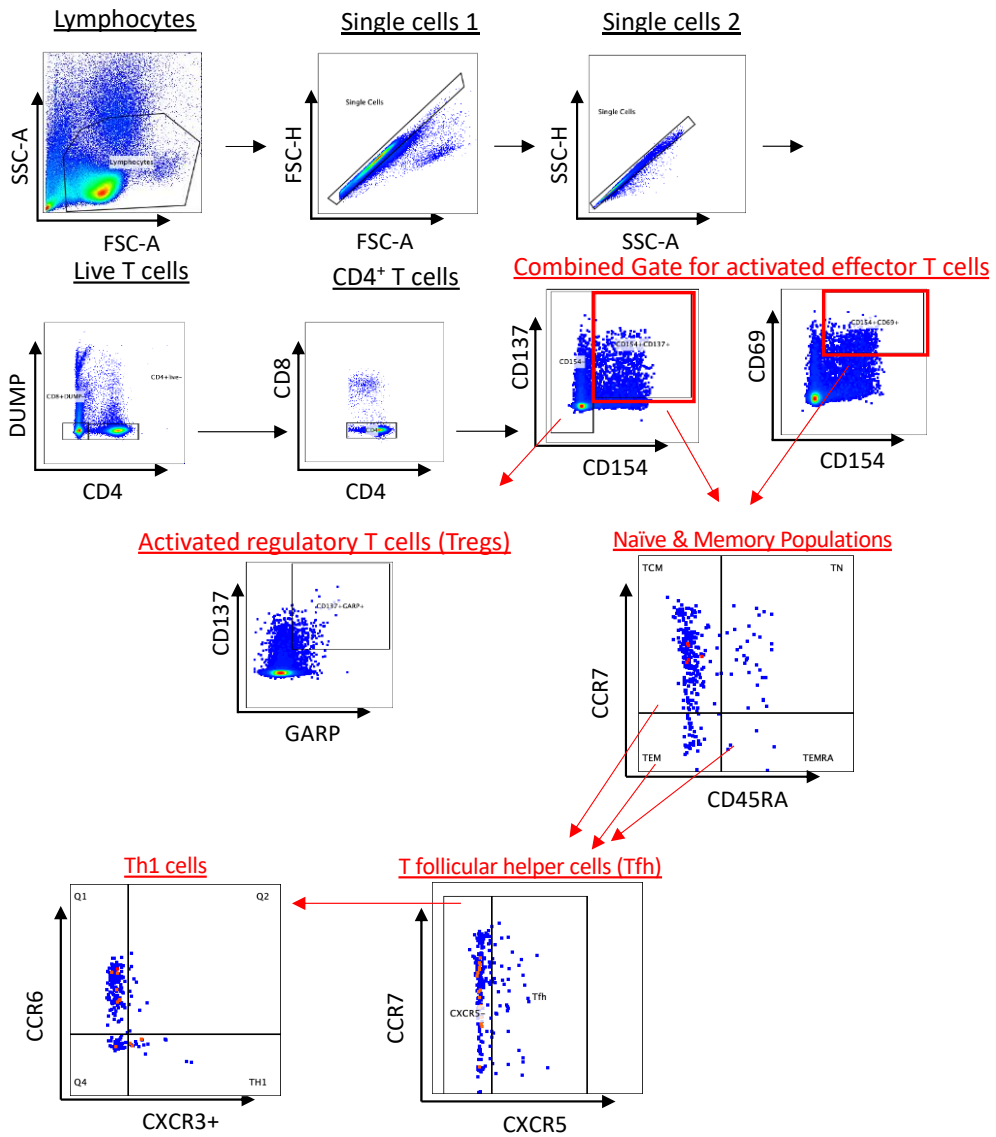

**Supplementary Figure 2: Gating scheme for the identification of the antigen activated effector, regulatory T cells, memory and naïve populations and T helper 1 cells.** This figure represents an example of the gating strategy identifying the activated CD4<sup>+</sup> T cells by the used SARS-Cov-2 peptides. PBMCs were incubated with **A)** peptide diluent (DMSO) as a negative control and **B)** the domain 1 of the spike protein of SARS-CoV-2. Lymphocytes were gated based on SSC and FSC properties. From lymphocytes, doublet cells were excluded and live CD4<sup>+</sup> T cells were gated based on the CD4 expression and the DUMP channel. Further selection of CD4<sup>+</sup> T cells was achieved by excluding the CD8<sup>+</sup> T cells. The activated effector T cell responses were gated by combining the expression of CD154, CD137 and CD69. After the exclusion of CD154<sup>+</sup> cells, the regulatory T cell responses (Tregs) were gated based on the expression of CD137 and GARP. The identification of the memory (TCM, TEM, TEMRA) and naïve populations (TN) was achieved based on the expression of CCR7 and CD45RA from the activated T effector populations. Then by excluding the naïve T cells, T follicular helper cells (Tfh) were gated based on the expression of CCR7 and CXCR5. Finally, after the exclusion of the Tfh cells, T helper 1 cells (Th1) were gated based on the expression of CXCR3 and CCR6.

### Supplementary Figure 3

3A

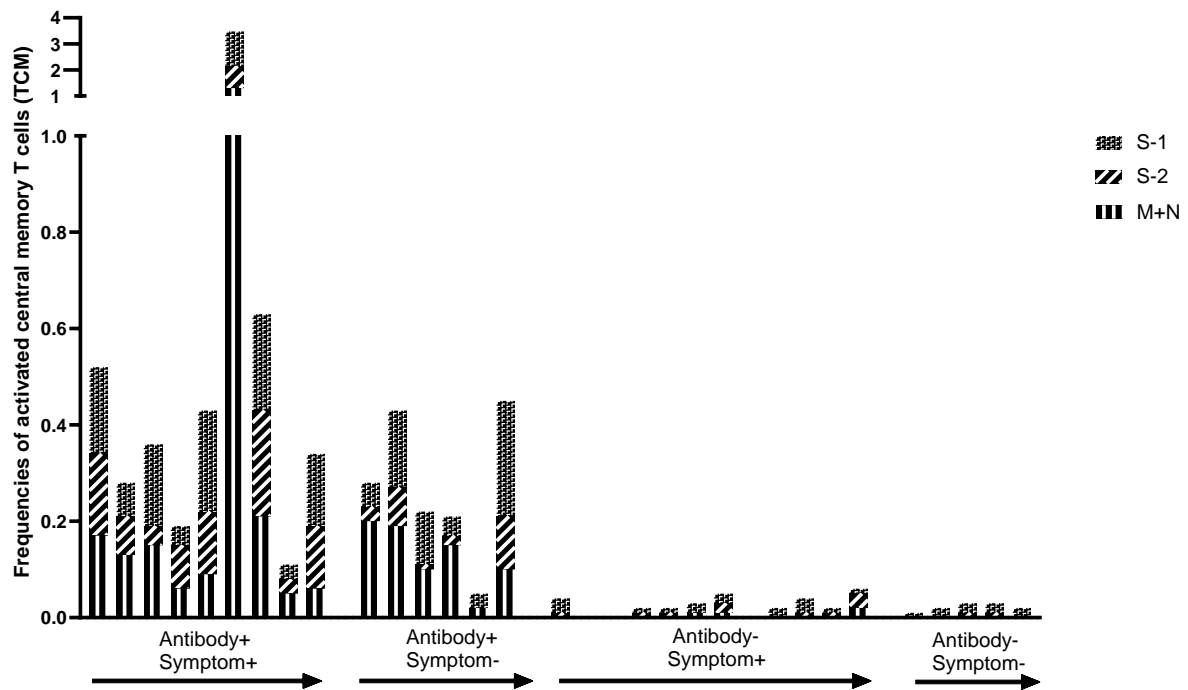

3B

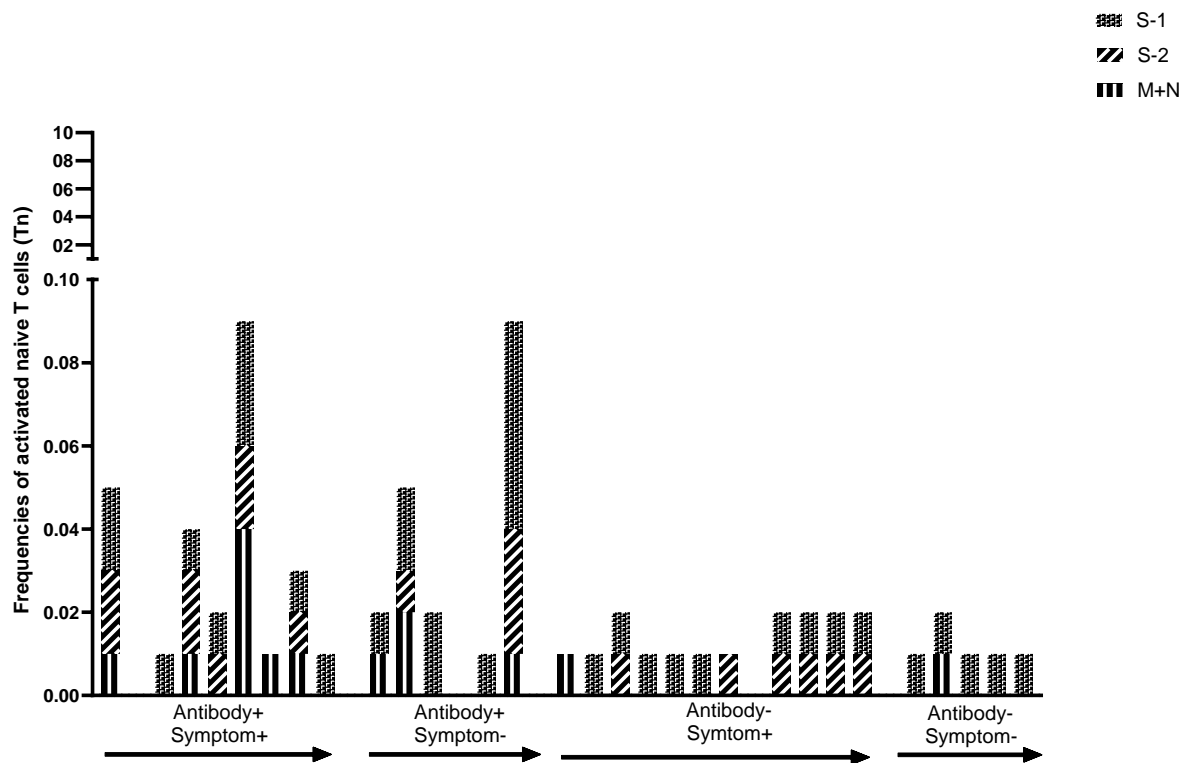



3C

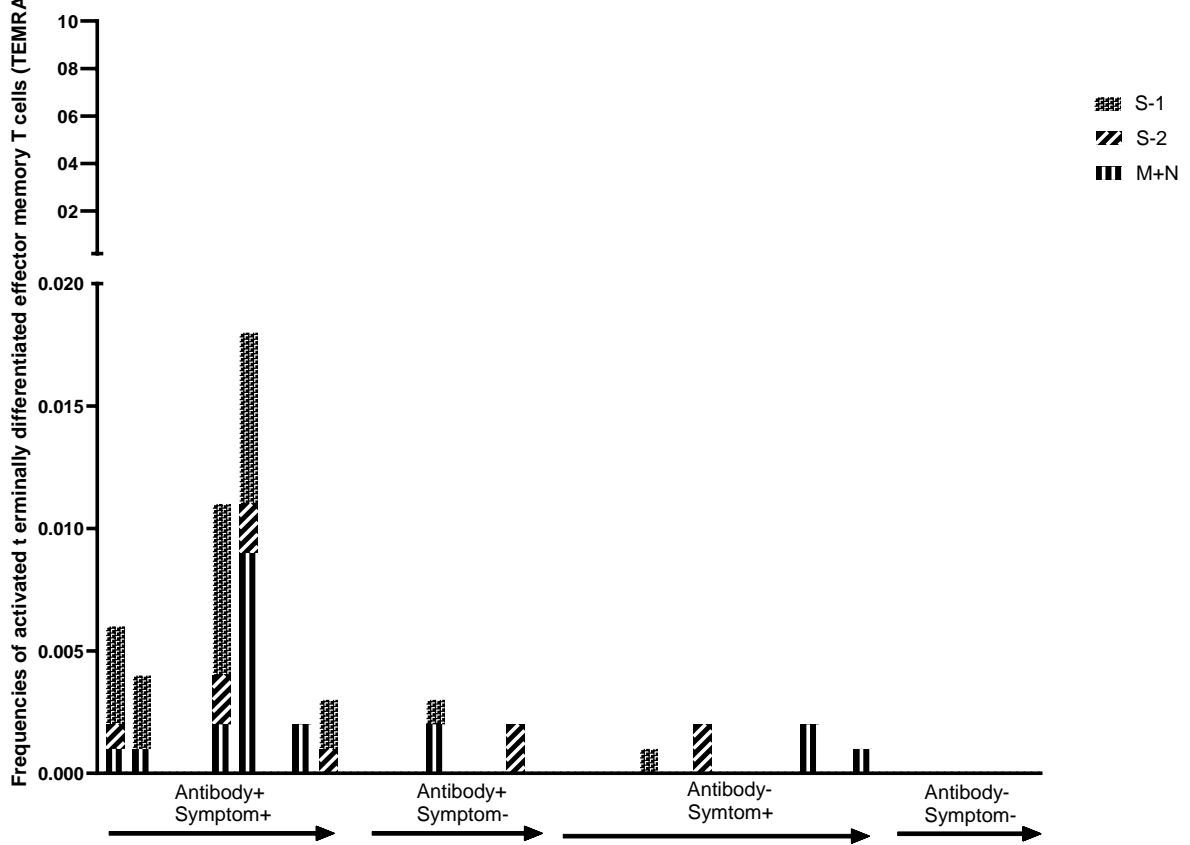

3D

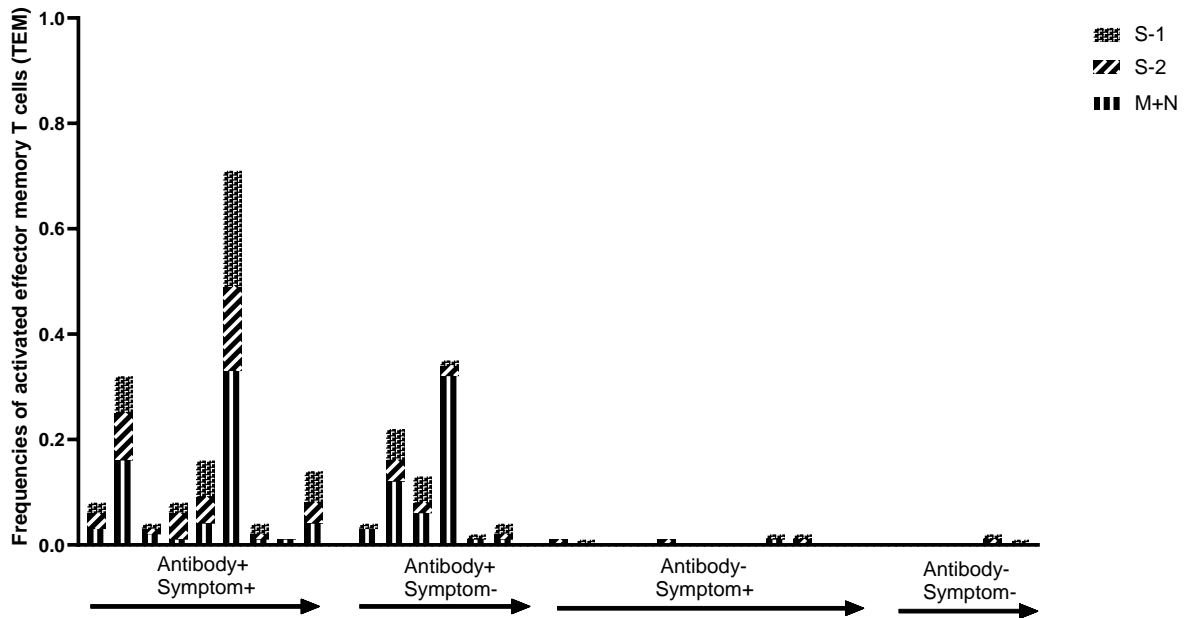

3E

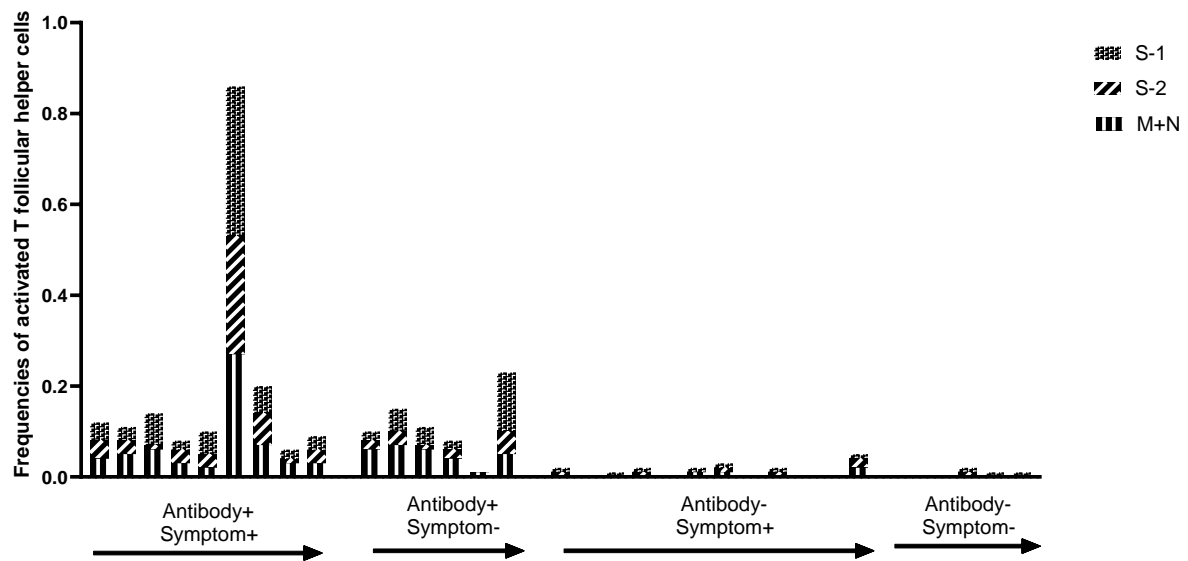

3F

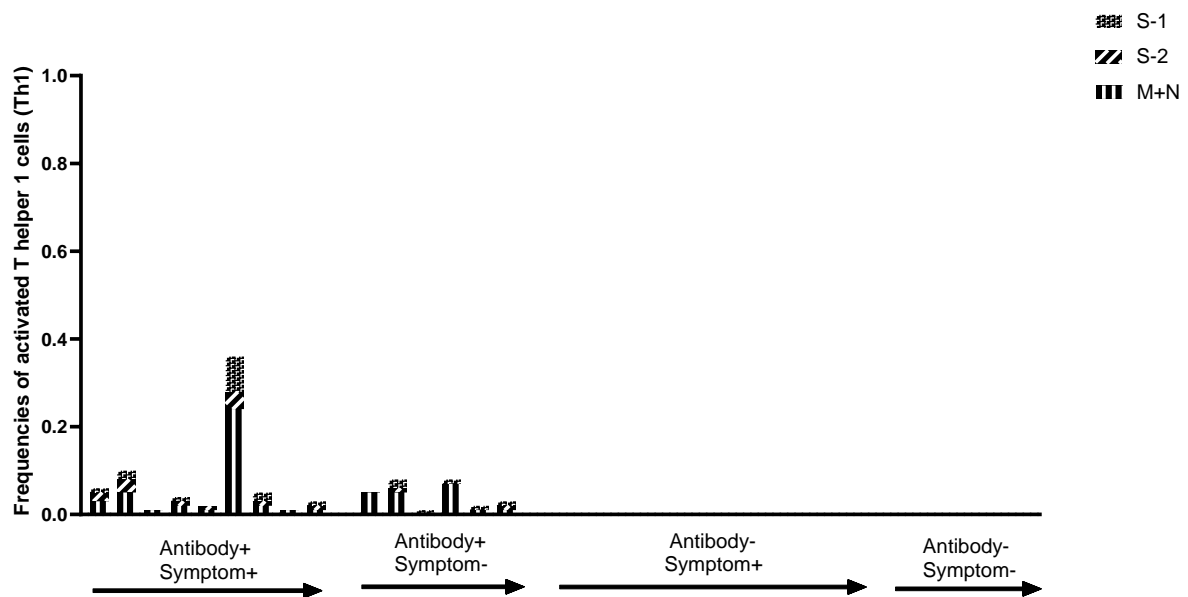

**Supplementary Figure 3: T cell subset responses according to antibody and symptom status.**

- A) Frequency of activated central memory T cells (TCM) for each participant, with bars subdivided into S-1, S-2, and M+N pools.
- B) Frequency of activated naive T cells (TN) for each participant, with bars subdivided into S-1, S-2, and M+N pools.
- C) Frequency of activated terminally differentiated effector memory T cells (TEMRA) for each participant, with bars subdivided into S-1, S-2, and M+N pools.
- D) Frequency of activated effector memory T cells (TEM) for each participant, with bars subdivided into S-1, S-2, and M+N pools.
- E) Frequency of activated T follicular helper cells (Tfh) for each participant, with bars subdivided into S-1, S-2, and M+N pools.

F) Frequency of activated T helper 1 cells (Th1) for each participant, with bars subdivided into S-1, S-2, and M+N pools.

All T cell subsets are expressed as a frequency of total CD4 T cells.
